# Supplementary material
Source: ML conference proceedings conference paper supplement (https://proceedings.neurips.cc/paper_files/paper/2014/hash/287e03db1d99e0ec2edb90d079e142f3-Abstract.html)
Supplement: Supplementary file [file 287e03db1d99e0ec2edb90d079e142f3-Supplemental.zip]

## Appendix

### A Omitted Proofs from Section 3

#### A.1 Proof of Lemma 3.2

Observe that in iteration  $t$ , two consecutive intervals  $I_{t-1,i}$  and  $I_{t-1,i+1}$  correspond to two unions of consecutive intervals  $I_a \cup \dots \cup I_b$  and  $I_{b+1} \cup \dots \cup I_c$  respectively from the original partition  $\mathcal{P}_0$ . Moreover, since each interval in  $\mathcal{P}_{t-1} \setminus \mathcal{F}_{t-1}$ ,  $t > 1$ , is formed by merging two consecutive intervals from  $\mathcal{P}_{t-2} \setminus \mathcal{F}_{t-2}$ , it must be the case that  $b - a + 1, c - b + 1 \leq 2^{t-1} < 2^{s-1} \leq 1/(2\varepsilon')$ . Hence, by Lemma 3.1, we have

$$|p(I_{t-1,i}) - \hat{p}_m(I_{t-1,i})| \leq \sqrt{\varepsilon' \cdot 2^{s-1}} \cdot \frac{\varepsilon'}{10k} \leq \frac{\varepsilon'}{10\sqrt{2}k}$$

and similarly,

$$|p(I_{t-1,i+1}) - \hat{p}_m(I_{t-1,i+1})| \leq \frac{\varepsilon'}{10\sqrt{2}k}.$$

To simplify notation, let  $I = I_{t-1,i}$  and  $J = I_{t-1,i+1}$ . By definition of  $\alpha$ ,

$$\begin{aligned} \alpha_p(I, J) &= \left| \frac{p(I)}{|I|} - \frac{p(I) + p(J)}{|I| + |J|} \right| |I| + \left| \frac{p(J)}{|J|} - \frac{p(I) + p(J)}{|I| + |J|} \right| |J| \\ &= \frac{2}{|I| + |J|} |p(I)|J| - p(J)|I||. \end{aligned} \quad (1)$$

A straightforward calculation now gives that

$$\begin{aligned} |\alpha_p(I, J) - \alpha_{\hat{p}_m}(I, J)| &= \frac{2}{|I| + |J|} \left| |p(I)|J| - p(J)|I| - |\hat{p}_m(I)|J| - \hat{p}_m(J)|I| \right| \\ &\leq \frac{2}{|I| + |J|} \left( |p(I) - \hat{p}_m(I)||J| + |p(J) - \hat{p}_m(J)||I| \right) \\ &\leq 2\varepsilon'/(5k). \end{aligned}$$

#### A.2 Proof of Lemma 3.3

We start by recording a basic fact that will be useful in the proof of the lemma. Let  $p$  be a distribution over an interval  $I$  and let  $q$  be any sub-distribution over  $I$ . Perhaps contrary to initial intuition, the optimal scaling  $c \cdot q$ ,  $c > 0$ , of  $q$  to approximate  $p$  (with respect to the  $L_1$ -distance) is not necessarily obtained by scaling  $q$  so that  $c \cdot q$  is a distribution over  $I$ . However, a simple argument (see e.g., Appendix A.1 of [CDSS14]) shows that scaling so that  $c \cdot q$  is a distribution cannot result in  $L_1$ -error more than twice that of the optimal scaling:

**Claim A.1.** *Let  $p, g : I \rightarrow \mathbb{R}^{\geq 0}$  be probability distributions over  $I$  (so  $\int_I p(x)dx = \int_I g(x)dx = 1$ ). Then, writing  $\|f\|_1$  to denote  $\int_I |f(x)|dx$ , for every  $a > 0$  we have that  $\|p - g\|_1 \leq 2\|p - ag\|_1$ .*

We now proceed with the proof of Lemma 3.3.

We first show that a total of at most  $O(k \log(1/\varepsilon'))$  intervals are ever added into  $\mathcal{F}_t$  across all executions of Step 4(b).

Suppose that intervals  $I_{t-1,i}, I_{t-1,i+1}$  are added into  $\mathcal{F}_t$  in some execution of Step 4(b). We consider the following two cases:

**Case 1:**  $I_{t-1,i} \cup I_{t-1,i+1}$  contains at least one breakpoint of  $\mathcal{Q}$ . Since  $\mathcal{Q}$  has at most  $k$  breakpoints, this can happen at most  $k$  times in total.

**Case 2:**  $I_{t-1,i} \cup I_{t-1,i+1}$  does not contain any breakpoint of  $\mathcal{Q}$ . Then  $I_{t-1,i} \cup I_{t-1,i+1}$  is a subset of an interval in  $\mathcal{Q}$ . Recalling that intervals  $I_{t-1,i}, I_{t-1,i+1}$  were added into  $\mathcal{F}_t$  in an execution of Step 4(b), we have that  $\alpha_{\hat{p}_m}(I_{t-1,i}, I_{t-1,i+1}) > \varepsilon'/(2k)$ , and hence by Lemma 3.2, we have that  $\alpha_p(I_{t-1,i}, I_{t-1,i+1}) \geq \frac{1}{5} \cdot \frac{\varepsilon'}{k}$ . Claim A.1 now implies that the contribution to the

$L_1$  distance between  $p$  and  $q$  from  $I_{t-1,i} \cup I_{t-1,i+1}$ , i.e.,  $\int_{I_{t-1,i} \cup I_{t-1,i+1}} |p(x) - q(x)| dx$ , is at least  $\frac{1}{10} \frac{\varepsilon'}{k}$ .

Since  $\|p - q\|_1 = \text{opt}_k(p)$ , there can be at most

$$k + O\left(\frac{\text{opt}_k(p) \cdot k}{\varepsilon'}\right) = O\left(k \cdot \log \frac{1}{\varepsilon}\right)$$

intervals ever added into  $\mathcal{F}_t$  across all executions of Step 4(b) (note that for the last equality we have used the assumption that  $\text{opt}_k(p) \leq \varepsilon$ ).

Next, we argue that each  $\mathcal{F}_t$  satisfies  $|\mathcal{F}_t| \leq O(k \log^2(1/\varepsilon))$ . We have bounded the number of intervals added into  $\mathcal{F}_t$  in Step 4(b) by  $O(k \log(1/\varepsilon'))$ , so it remains to bound the number of intervals added in Step 4(c)(Case 3) and 4(c)(Case 4). It is clear that a total of at most  $O(\log(1/\varepsilon'))$  intervals are ever added in 4(c)(Case 4). Inspection of Step 4(c)(Case 3) shows that for a given value of  $t$ , the number of intervals that this step adds to  $\mathcal{F}_t$  is at most the number of “blocks” of consecutive  $\mathcal{F}_t$ -intervals. Since each interval added in Step 4(c)(Case 3) extends some blocks of consecutive  $\mathcal{F}_t$ -intervals but does not create a new one (and hence does not increase their number), across the  $s = \log(1/\varepsilon')$  stages, the total number of intervals that can be added in executions of Step 4(c)(Case 3) is at most  $O(k \log^2(1/\varepsilon'))$ . It follows that we have  $|\mathcal{F}_s| = O(k \log^2(1/\varepsilon))$  as claimed.

To bound  $|\mathcal{P}_t \setminus \mathcal{F}_t|$ , we observe that by inspection of the algorithm, for each  $t$  we have  $|\mathcal{P}_t \setminus \mathcal{F}_t| \leq \frac{1}{2} |\mathcal{P}_{t-1} \setminus \mathcal{F}_{t-1}|$ . Since  $|\mathcal{P}_0| = \Theta(k/\varepsilon')$ , it follows that  $|\mathcal{P}_s \setminus \mathcal{F}_s| = O(k)$ , and the lemma is proved.

### A.3 Proof of Lemma 3.4

Fix an interval  $I$  in  $\mathcal{P}$ . If there does not exist an interval  $J$  in  $\mathcal{Q}$  such that  $I \subseteq J$ , then  $I$  must contain a breakpoint of  $\mathcal{Q}$ , and hence since  $\mathcal{P}$  is  $\varepsilon'$ -good for  $(p, q)$ , we have  $p(I) \leq \varepsilon'/(2k)$ . This implies that the contribution to  $\|(p)^\mathcal{P} - q\|_1$  that comes from  $I$ , namely  $\int_I |(p)^\mathcal{P}(x) - q(x)| dx$ , satisfies

$$\begin{aligned} \int_I |(p)^\mathcal{P}(x) - q(x)| dx &\leq \int_I |(p)^\mathcal{P}(x) - p(x)| dx + \int_I |p(x) - q(x)| dx \\ &\leq \int_I |p(x) - q(x)| dx + 2p(I) \\ &\leq \int_I |p(x) - q(x)| dx + \frac{\varepsilon'}{k}. \end{aligned}$$

The other possibility is that there exists an interval  $J$  in  $\mathcal{Q}$  such that  $I \subseteq J$ . In this case, we have that

$$\int_I |(p)^\mathcal{P}(x) - q(x)| dx \leq \int_I |p(x) - q(x)| dx.$$

Since there are at most  $k$  intervals in  $\mathcal{P}$  containing breakpoints of  $\mathcal{Q}$ , summing the above inequalities over all intervals  $I$  in  $\mathcal{P}$ , we get that

$$\|(p)^\mathcal{P} - q\|_1 \leq \|p - q\|_1 + \varepsilon' = \text{opt}_k(p) + \varepsilon',$$

and hence

$$\|(p)^\mathcal{P} - p\|_1 \leq \|(p)^\mathcal{P} - q\|_1 + \|p - q\|_1 \leq 2\text{opt}_k(p) + \varepsilon'.$$

### A.4 Proof of Lemma 3.5

We construct the claimed  $\mathcal{R}$  based on  $\mathcal{P}_s, \mathcal{P}_{s-1}, \dots, \mathcal{P}_0$  as follows:

- (i) If  $I$  is an interval in  $\mathcal{P}_s$  not containing a breakpoint of  $\mathcal{Q}$ , then  $I$  is also in  $\mathcal{R}$ .
- (ii) If  $I$  is an interval in  $\mathcal{P}_s$  that does contain a breakpoint of  $\mathcal{Q}$ , then we further partition  $I$  into a set of intervals  $S$  by calling procedure `Refine-partition(s, I)`. This recursive procedure exploits the local structure of the earlier, finer partitions  $\mathcal{P}_{s-1}, \mathcal{P}_{s-2}, \dots$  as described below.

**Procedure** Refine-partition:

**Input:** Integer  $t$ , Interval  $J$

**Output:**  $S$ , a partition of interval  $J$

1. If  $t = 0$ , then output  $\{J\}$ .
2. If  $J$  is an interval in  $\mathcal{P}_t$ , then
  - (a) If  $J$  contains a breakpoint of  $\mathcal{Q}$ , then output Refine-partition( $t - 1$ ,  $J$ ).
  - (b) Otherwise output  $\{J\}$ .
3. Otherwise,  $J$  is a union of two intervals in  $\mathcal{P}_t$ . Let  $J_1$  and  $J_2$  denote the two intervals in  $\mathcal{P}_t$  such that  $J_1 \cup J_2 = J$ . Output Refine-partition( $t$ ,  $J_1$ )  $\cup$  Refine-partition( $t$ ,  $J_2$ ).

We claim that  $|\mathcal{R}|$  (the number of intervals in  $\mathcal{R}$ ) is at most  $|\mathcal{P}_s| + O(k \cdot \log \frac{1}{\varepsilon})$ . To see this, note that each interval  $I \in \mathcal{P}_s$  not containing a breakpoint of  $\mathcal{Q}$  (corresponding to (i) above) translates directly to a single interval of  $\mathcal{R}$ . For each interval of type (ii) in  $\mathcal{P}_s$ , inspection of the Refine-Partition procedure shows that these intervals are partitioned into at most  $O(k \log(1/\varepsilon))$  intervals in  $\mathcal{R}$ .

In the rest of the proof, we show that for any interval  $J$  in  $\mathcal{P}_s$  containing at least one breakpoint of  $\mathcal{Q}$ , the contribution to the  $L_1$  distance between  $(p)^{\mathcal{P}_s}$  and  $(p)^{\mathcal{R}}$  coming from interval  $J$  is at most  $|b_J| \cdot \frac{\varepsilon' \log \frac{1}{\varepsilon}}{k}$ , where  $b_J$  is the set of breakpoints of  $\mathcal{Q}$  in  $J$ .

Consider a fixed breakpoint  $v$  of  $\mathcal{Q}$ . Let  $I_{t,v}$  denote the interval containing  $v$  in the partition  $\mathcal{P}_t$ . If  $I_{t,v}$  merges with another interval in  $\mathcal{P}_t$  in Case 1 of Step 4(c), we denote that other interval as  $I'_{t,v}$ . Since  $I_{t,v}$  merges with  $I'_{t,v}$  in Case 1 of Step 4(c), these intervals are both not in  $\mathcal{F}_t$  and hence were both not in  $\mathcal{F}_{t-1}$  in Step 4(b). Consequently when  $t > 1$  it must be the case that condition (ii) of Step 4(b) does not hold for these intervals, i.e.  $\alpha_{\widehat{p}_m}(I_{t,v}, I'_{t,v}) \leq \varepsilon'/(2k)$ . It follows that by Lemma 3.2, we have that  $\alpha_p(I_{t,v}, I'_{t,v})$  is at most  $\frac{4\varepsilon'}{5k}$ . When  $t = 1$ , we have a similar bound  $\alpha_p(I_{t,v}, I'_{t,v}) \leq \varepsilon'/k$ , by using (1) and the fact that  $p(I_{t,v}), p(I'_{t,v}) \leq \varepsilon'/2k$  when  $I_{t,v}, I'_{t,v} \in \mathcal{P}_0$ .

On the other hand, inspection of the procedure Refine-Partition gives that if two intervals in  $\mathcal{P}_t$  are unions of some intervals in Refine-partition( $s, I$ ), and their union is an interval in  $\mathcal{P}_{t+1}$ , then there exists  $v$  which is a breakpoint of  $\mathcal{Q}$  such that the two intervals are  $I_{t,v}$  and  $I'_{t,v}$ .

Thus, the contribution to the  $L_1$  distance between  $(p)^{\mathcal{P}_s}$  and  $(p)^{\mathcal{R}}$  coming from interval  $J$  is at most  $\frac{\varepsilon'}{k} \cdot \log \frac{1}{\varepsilon'} \cdot |b_J|$ . Summing over all intervals  $J$  that contain at least one breakpoint and recalling that the total number of breakpoints is at most  $k$ , we get that the overall  $L_1$  distance between  $(p)^{\mathcal{P}_s}$  and  $(p)^{\mathcal{R}}$  is at most  $\varepsilon$ .

## A.5 Proof of Theorem 6

*Proof.* The algorithm  $A'$  works in two stages, which we describe and analyze below.

In the first stage,  $A'$  iterates over  $\lceil \log(20/\varepsilon) \rceil$  “guesses” for the value of  $\text{opt}_{\mathcal{C}}(p)$ , where the  $i$ -th guess  $g_i$  is  $\frac{\varepsilon}{10} \cdot 2^{i-1}$  (so  $g_1 = \frac{\varepsilon}{10}$  and  $g_{\lceil \log(20/\varepsilon) \rceil} \geq 1$ ). For each value of  $g_i$ , it performs  $r = O(1)$  runs of Algorithm  $A$  (using a fresh sample from  $p$  for each run) using parameter  $g_i$  as the “ $\varepsilon$ ” parameter for each run; let  $h_{1,i}, \dots, h_{r,i}$  be the  $r$  hypotheses thus obtained for the  $i$ -th guess. It is clear that this stage uses  $O(m(\varepsilon/10) + m(2\varepsilon/10) + \dots) = O(m(\varepsilon))$  draws from  $p$ , and similarly that it runs in time  $O(t(\varepsilon))$ . If  $\text{opt}_{\mathcal{C}}(p) \leq \varepsilon$ , then (for a suitable choice of  $r = O(1)$ ) we get that with probability at least  $39/40$ , some hypothesis  $h_{1,\ell}$  satisfies  $\|p - h_{1,\ell}\| \leq \alpha \cdot \text{opt}_{\mathcal{C}}(p) + \varepsilon/10$ . Otherwise, there must be some  $i \in \{2, \dots, \lceil \log(20/\varepsilon) \rceil\}$  such that  $g_i/2 < \text{opt}_{\mathcal{C}}(p) \leq g_i$ ; in this case, for a suitable choice of  $r = O(1)$  we get that with probability at least  $39/40$ , there is some hypothesis  $h_{i,\ell}$  that satisfies  $\|p - h_{i,\ell}\|_1 \leq \alpha \cdot \text{opt}_{\mathcal{C}}(p) + g_i \leq (\alpha + 2) \cdot \text{opt}_{\mathcal{C}}(p)$ . Thus in either event, with probability at least  $39/40$  some  $h_{i,\ell}$  satisfies  $\|p - h_{i,\ell}\|_1 \leq (\alpha + 2) \cdot \text{opt}_{\mathcal{C}}(p) + \varepsilon/10$ .

In the second stage,  $A'$  runs a hypothesis selection procedure to choose one of the candidate hypotheses  $h_{i,\ell}$ . A number of such procedures are known (see e.g. Section 6.6 of [DL01] or

[DDS12, DK14, AJOS14]); all of them work by running some sort of “tournament” over the hypotheses, and all have the guarantee that with high probability they will output a hypothesis from the pool of candidates which has  $L_1$  error (with respect to the target distribution  $p$ ) not much worse than that of the best candidate in the pool. We use the classic Scheffé algorithm (see [DL01]) as described and analyzed in [AJOS14] (see Algorithm SCHEFFE\* in Appendix B of that paper). Adapted to our context, this algorithm has the following performance guarantee:

**Proposition A.2.** *Let  $p$  be a target distribution over  $[0, 1)$  and let  $\mathcal{D}_\tau = \{p_j\}_{j=1}^N$  be a collection of  $N$  distributions over  $[0, 1)$  with the property that there exists  $i \in [N]$  such that  $\|p - p_i\|_1 \leq \tau$ . There is a procedure SCHEFFE which is given as input a parameter  $\varepsilon > 0$  and a confidence parameter  $\delta > 0$ , and is provided with access to*

- (i) *i.i.d. draws from  $p$  and from  $p_i$  for all  $i \in [N]$ , and*
- (ii) *an evaluation oracle  $\text{eval}_{p_i}$  for each  $i \in [N]$ . This is a procedure which, on input  $r \in [0, 1)$ , outputs the value  $p_i(r)$  of the pdf of  $p_i$  at the point  $r$ .*

*The procedure SCHEFFE has the following behavior: It makes  $s = O((1/\varepsilon^2) \cdot (\log N + \log(1/\delta)))$  draws from  $p$  and from each  $p_i$ ,  $i \in [N]$ , and  $O(s)$  calls to each oracle  $\text{eval}_{p_i}$ ,  $i \in [N]$ , and performs  $O(sN^2)$  arithmetic operations. With probability at least  $1 - \delta$  it outputs an index  $i^* \in [N]$  that satisfies  $\|p - p_{i^*}\|_1 \leq 10 \max\{\tau, \varepsilon\}$ .*

The algorithm  $A'$  runs the procedure SCHEFFE using the  $N = O(\log(1/\varepsilon))$  hypotheses  $h_{i,\ell}$ , with its “ $\varepsilon$ ” parameter set to  $\frac{1}{10}$  (the input parameter  $\varepsilon$  that is given to  $A'$ ) and its “ $\delta$ ” parameter set to  $1/40$ . By Proposition A.2, with overall probability at least  $19/20$  the output is a hypothesis  $h_{i,\ell}$  satisfying  $\|p - h_{i,\ell}\|_1 \leq 10(\alpha + 2)\text{opt}_C(p) + \varepsilon$ . The overall running time and sample complexity are easily seen to be as claimed, and the theorem is proved.  $\square$

## B Proof of Theorem 7

We write  $\mathcal{U}_{2N}$  to denote the uniform distribution over  $[2N]$ . The following proposition shows that  $\mathcal{U}_{2N}$  has  $L_1$  distance from  $p_{S_1, S_2, t}$  almost twice that of the optimal 2-flat distribution:

**Proposition B.1.** *Fix any  $0 < t < 1/2$ .*

1. *For any distribution  $p_{S_1, S_2, t}$  in the support of  $\mathcal{D}_t$ , we have*

$$\|\mathcal{U}_{2N} - p_{S_1, S_2, t}\|_1 = t.$$

2. *For any distribution  $p_{S_1, S_2, t}$  in the support of  $\mathcal{D}_t$ , we have*

$$\text{opt}_2(p_{S_1, S_2, t}) \leq \frac{t}{2} \left( 1 + \frac{t}{1-t} \right).$$

*Proof.* Part (1.) is a simple calculation. For part (2.), consider the 2-flat distribution

$$q(i) = \begin{cases} \frac{1}{2N} \left( 1 + \frac{t}{2(1-t)} \right) & \text{if } i \in [N] \\ \frac{1}{2N} \left( 1 - \frac{t}{2(1-t)} \right) & \text{if } i \in [N+1, \dots, 2N] \end{cases}$$

It is straightforward to verify that  $\|p_{S_1, S_2, t} - q\|_1 = \frac{t}{2} \left( 1 + \frac{t}{1-t} \right)$  as claimed.  $\square$

For a distribution  $p$  we write  $A^p$  to indicate that algorithm  $A$  is given access to i.i.d. points drawn from  $p$ .

The following simple proposition states that no algorithm can successfully distinguish between a distribution  $p_{S_1, S_2, t} \sim \mathcal{D}_t$  and  $\mathcal{U}_{2N}$  using fewer than (essentially)  $\sqrt{N}$  draws:

**Proposition B.2.** *There is an absolute constant  $c > 0$  such that the following holds: Fix any  $0 < t < 1/2$ , and let  $B$  be any “distinguishing algorithm” which receives  $c\sqrt{N}$  i.i.d. draws from a distribution over  $[2N]$  and outputs either “uniform” or “non-uniform”. Then*

$$|\Pr[B^{\mathcal{U}_{[2N]}} \text{ outputs “uniform”}] - \Pr_{p_{S_1, S_2, t} \sim \mathcal{D}_t}[B^{p_{S_1, S_2, t}} \text{ outputs “uniform”}]| \leq 0.01. \quad (2)$$

The proof is an easy consequence of the fact that in both cases (the distribution is  $\mathcal{U}_{[2N]}$ , or the distribution is  $p_{S_1, S_2, t} \sim \mathcal{D}_t$ ), with probability at least 0.99 the  $c\sqrt{N}$  draws received by  $A$  are a uniform random set of  $c\sqrt{N}$  distinct elements from  $[2N]$  (this can be shown straightforwardly using a birthday paradox type argument).

Now we use Proposition B.2 to show that any  $(2 - \delta)$ -semi-agnostic learning algorithm even for 2-flat distributions must use a sample of size  $\Omega(\sqrt{N})$ , and thereby prove Theorem 7:

**Theorem 7.** *Fix any  $\delta > 0$  and any function  $f(\cdot)$ . There is no algorithm  $A$  with the following property: given  $\varepsilon > 0$  and access to independent points drawn from an unknown distribution  $p$  over  $[2N]$ , algorithm  $A$  makes  $o(\sqrt{N}) \cdot f(\varepsilon)$  draws from  $p$  and with probability at least 51/100 outputs a hypothesis distribution  $h$  over  $[2N]$  satisfying  $\|h - p\|_1 \leq (2 - \delta)\text{opt}_2(p) + \varepsilon$ .*

*Proof.* Fix a value of  $\delta > 0$  and suppose, for the sake of contradiction, that there exists such an algorithm  $A$ . We describe how the existence of such an algorithm  $A$  yields a distinguishing algorithm  $B$  that violates Proposition B.2.

The algorithm  $B$  works as follows, given access to i.i.d. draws from an unknown distribution  $p$ . It first runs algorithm  $A$  with its “ $\varepsilon$ ” parameter set to  $\varepsilon := \frac{\delta^3}{12(2+\delta)}$ , obtaining (with probability at least 51/100) a hypothesis distribution  $h$  over  $[2N]$  such that  $\|h - p\|_1 \leq (2 - \delta)\text{opt}_2(p) + \varepsilon$ . It then computes the value  $\|h - \mathcal{U}_{2N}\|_1$  of the  $L_1$ -distance between  $h$  and the uniform distribution (note that this step uses no draws from the distribution). If  $\|h - \mathcal{U}_{2N}\|_1 < 3\varepsilon/2$  then it outputs “uniform” and otherwise it outputs “non-uniform.”

Since  $\delta$  (and hence  $\varepsilon$ ) is independent of  $N$ , the algorithm  $B$  makes fewer than  $c\sqrt{N}$  draws from  $p$  (for  $N$  sufficiently large). To see that the above-described algorithm  $B$  violates (2), consider first the case that  $p$  is  $\mathcal{U}_{[2N]}$ . In this case  $\text{opt}_2(p) = 0$  and so with probability at least 51/100 the hypothesis  $h$  satisfies  $\|h - \mathcal{U}_{2N}\|_1 \leq \varepsilon$ , and hence algorithm  $B$  outputs “uniform” with probability at least 51/100.

On the other hand, suppose that  $p = p_{S_1, S_2, t}$  is drawn from  $\mathcal{D}_t$ , where  $t = \frac{\delta}{2+\delta}$ . In this case, with probability at least 51/100 the hypothesis  $h$  satisfies

$$\|h - p_{S_1, S_2, t}\|_1 \leq (2 - \delta)\text{opt}_2(p_{S_1, S_2, t}) + \varepsilon \leq (2 - \delta) \cdot \frac{t}{2} \cdot \left(1 + \frac{t}{1-t}\right) + \varepsilon,$$

by part (2.) of Proposition B.1. Since by part (1.) of Proposition B.1 we have  $\|\mathcal{U}_{2N} - p_{S_1, S_2, t}\|_1 = t$ , the triangle inequality gives that

$$\|h - \mathcal{U}_{2N}\|_1 \geq t - (2 - \delta) \cdot \frac{t}{2} \cdot \left(1 + \frac{t}{1-t}\right) - \varepsilon = 2\varepsilon,$$

where to obtain the final equality we recalled the settings  $\varepsilon = \frac{\delta^3}{12(2+\delta)}$ ,  $t = \frac{\delta}{2+\delta}$ . Hence algorithm  $B$  outputs “uniform” with probability at most 49/100. Thus we have

$$|\Pr[B^{\mathcal{U}_{[2N]}} \text{ outputs “uniform”}] - \Pr_{p_{S_1, S_2, t} \sim \mathcal{D}_t}[B^{p_{S_1, S_2, t}} \text{ outputs “uniform”}]| \geq 0.02$$

which contradicts (2) and proves the theorem.  $\square$
